# Supplementary material
Source: publisher figshare collection journal article supplement (https://geolsoc.figshare.com/ndownloader/files/27635376)
Supplement: Supplementary file 1 [file 27635376]

## Sheet: Sheet1
	Table A volcano parameters
	Num.	Volcano	Vent	Longitude ( E )	Latitude ( N )	X/m	Y/m	Altitude/m	distance to the closest volcano/m	cone type	Crater elongation azimuth	eruptiive fissure azimuth	Coalescent crater	Cone breaching &depression azimuth	Long crater axis length	Short crater axis length	Long/Short axis ratios of crater	cone type
	1		A1	120.331	47.2354	297.914	5236.97	1288.69	1783	simple elongated	49			49	716	414	1.72947	simple elongated
	2		A2	120.352	47.2427	299.532	5237.72	1154.25	1615	simple elongated	68			248	608	371	1.63881	simple elongated
	3		A3-#1	120.371	47.2498	300.973	5238.46	1186.49	1905	composite elongated				272	668			composite elongated
			A3-#2	120.378	47.25	301.533	5238.46	1234.27			85				605	482	1.25519
	4	Sifangshan	A4-#1	120.447	47.2628	306.755	5239.72	1182.82	5800	composite circular			67		823	730	1.1274	composite circular
			A4-#2	120.452	47.2645	307.167	5239.89	1188.44						63	248
	5		B1	120.473	47.3008	308.869	5243.88	1130.72	638			35
	6	Dichi Lake	B2	120.478	47.3054	309.294	5244.38	1106.93	370	simple elongated	36				202	162	1.24691	simple elongated
	7		B3	120.483	47.306	309.652	5244.43	1129.96	290	simple elongated	97				263	60	4.38333	simple elongated
	8		B4	120.487	47.3062	309.934	5244.45	1129.46	290	simple elongated	80				300	73	4.10959	simple elongated
	9		B5	120.495	47.3078	310.57	5244.61	1179.87	630	simple circular				249	253			simple circular
	10		B6-#1	120.503	47.3103	311.221	5244.86	1163.6	920	composite circular			80		54			composite elongated
			B6-#2	120.505	47.3103	311.338	5244.86	1174.93							53
			B6-#3	120.506	47.3106	311.442	5244.89	1177.41							45
			B6-#4	120.508	47.3109	311.561	5244.91	1181.44							41
	11	Shihaogou	B7-#1	120.563	47.3371	315.831	5247.7	1277.06	4500	composite circular			51		1146			composite circular
			B7-#2	120.57	47.3408	316.398	5248.1	1279.81							933
			B7-#3	120.575	47.3436	316.771	5248.4	1369.64							891
	12	Yanshan	B8-#1	120.621	47.358	320.261	5249.88	1488.8	2200	composite circular	74			254	652	434	1.5023	composite circular
			B8-#2	120.629	47.3602	320.854	5250.11	1424.58							608
			B8-#3	120.623	47.3632	320.41	5250.46	1455.98							647
	13	Gaoshan	B9-#1	120.65	47.3705	322.475	5251.21	1626.19	2200	composite circular			358	251	410			composite circular
			B9-#2	120.65	47.3675	322.476	5250.87	1591.09
	14		B10	120.734	47.3899	328.946	5253.18	1382.17	4100	simple circular					437			simple circular
	15		B11	120.782	47.408	332.572	5255.08	1110.82	4100	simple elongated	60			60	533	244	2.18443	simple elongated
	16	Wusulangzi Lake	C1	120.337	47.3011	298.599	5244.26	1043	5300	complex					3051			complex
	17	Tianchi Lake	C2	120.405	47.3172	303.782	5245.87	1278.36	1400	simple elongated	61				800	511	1.56556	simple elongated
	18		C3	120.422	47.3195	305.128	5246.09	1289.09	1400	simple elongated	69				1146	281	4.07829	simple elongated
	19		C4	120.443	47.3271	306.698	5246.88			simple elongated				59	620	362	1.71271	simple elongated
	20		C5	120.458	47.3343	307.843	5247.64	1168.79	3000	simple elongated	68			48	446	251	1.77689	simple elongated
	21		C6	120.62	47.4056	320.34	5255.18			simple elongated	59
	22		D1-#1	120.59	47.4576	318.255	5261.03	1232.07	3600	composite circular			52	262	552			composite circular
			D1-#2	120.597	47.4613	318.825	5261.42	1222.82						299	670
	23	Tuofengling	D2-#1	120.644	47.4553	322.343	5260.65	1271.08	3600	composite elongated	319				1122	717	1.56485	composite elongated
			D2-#2	120.638	47.4552	321.87	5260.65	1306.7			338				527
			D2-#3	120.628	47.4541	321.151	5260.55	1276.37						224	166
	24		D3	120.727	47.4645	328.608	5261.48	1329.21	2100	simple elongated	134				973	760	1.28026	simple elongated
	25		D4	120.718	47.4831	328.038	5263.57	1361.35	2100	simple elongated	50				745	333	2.23724	simple elongated
	26		D5	120.777	47.4344	332.287	5258.03	1126.49	2500	simple circular	31			211	168	155	1.08387	simple circular
	27		D6	120.785	47.4572	332.992	5260.54	1280.52	1700	simple circular	33			81	720	695	1.03597	simple circular
	28		D7	120.805	47.4499	334.489	5259.69	1323.06	1700	simple elongated	39				460	358	1.28492	simple elongated
	29		D8	120.558	47.434	315.749	5258.48	1248	3600	simple elongated	72			72	530	329	1.61094	simple elongated
	30	Yueliang Lake	E1	120.868	47.5075	339.365	5265.96	1198.07	3100	simple elongated	45				553	476	1.16176	simple elongated
	31	Zigongshan	E2	120.909	47.5145	342.494	5266.66	1114.37	3100	simple elongated	58				497	258	1.92636	simple elongated
	32		E3-#1	120.953	47.5055	345.769	5265.57	1190.75	3400	composite elongated	61				687	294	2.33673	composite elongated
			E3-#2	120.961	47.5074	346.381	5265.76	1088.55			72				457	225	2.03111
	33	Heixiadong	F1	121.047	47.5172	352.866	5266.69	973.07	1000	simple elongated	54			234	915	701	1.30528	simple elongated
	34		F2	121.059	47.5211	353.798	5267.1	1169	1000	simple circular				145	234			simple circular
	35		F3-#1	121.093	47.535	356.417	5268.58	1035.62	3060	composite elongated	48			260	783	678	1.15487	composite elongated
			F3-#2	121.099	47.5381	356.875	5268.92	1020.76			73			73	511	259	1.97297
	36		F4	121.123	47.5468	358.702	5269.84	969.401	2100	simple circular				243	367			simple circular
	37		F5-#1	121.151	47.5572	360.875	5270.94	1016.46	2200	composite circular			65	352	852			composite circular
			F5-#2	121.144	47.5546	360.29	5270.67	1070.67
	38	Woniupo	G1	121.291	47.5721	371.411	5272.36	609.999	3020	complex					2753			complex
	39		G2	121.315	47.5938	373.236	5274.73	918.73	3020	simple circular				216	776			simple circular
	40	Buteha	H1	120.719	47.5887	328.405	5275.32	1024.82	9800	simple elongated	142				1581	1182	1.33756	simple elongated
	41	Aonier	H2	120.841	47.6219	337.736	5278.73	1210.53	9800	simple elongated	49			49	894	498	1.79518	simple elongated
